# Supplementary material for: Serum Metabolomics Investigation of Humanized Mouse Model of Dengue Virus Infection
Source: PubMed Central journal article supplement (PMC5487573; doi:10.1128/jvi.00386-17), 2017-06-26
Supplement: JVI.00386-17_zjv999182727s1.pdf [file JVI.00386-17_zjv999182727s1.pdf]

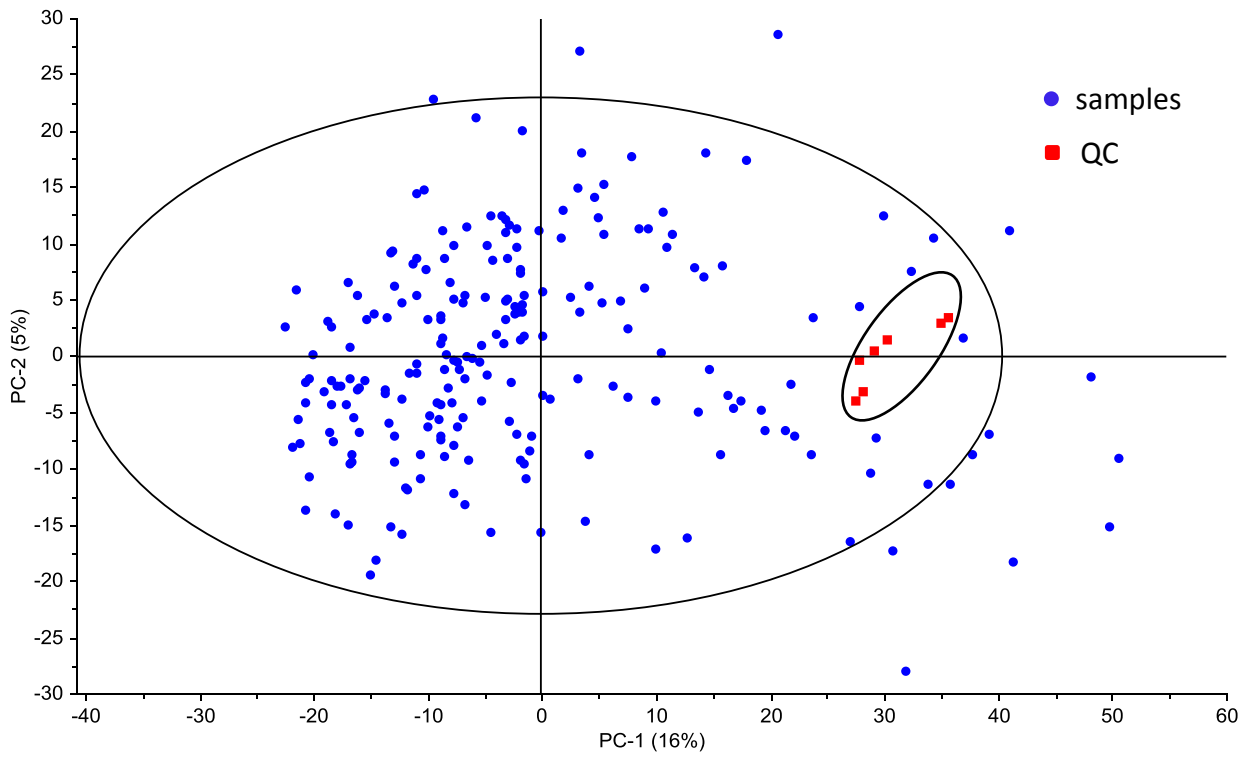

**Figure S1. PCA score plots of NSG and humanized mice with dengue infection.**

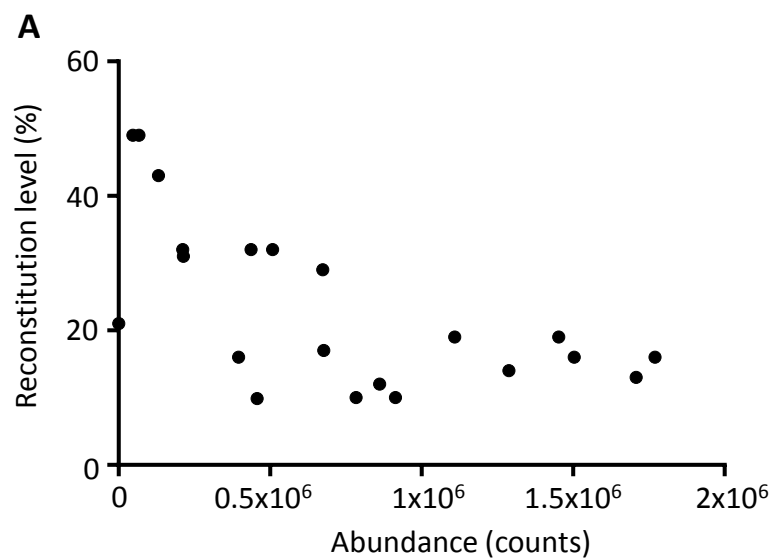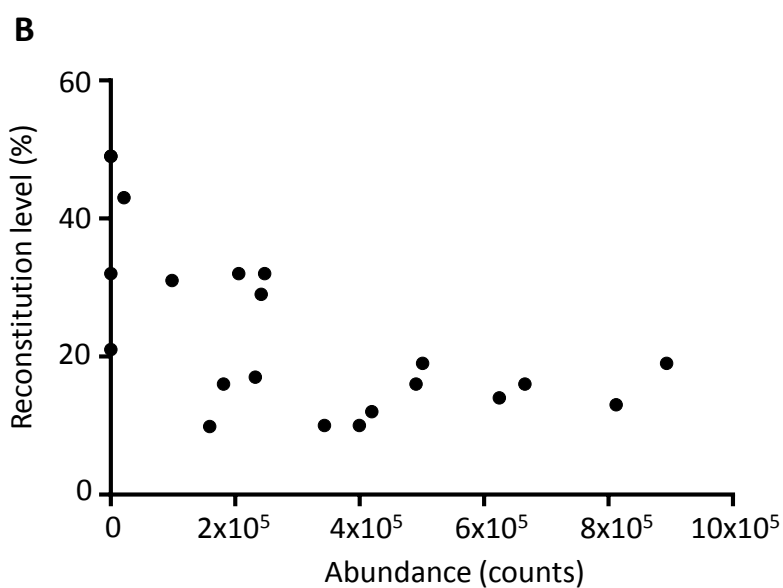

**Figure S2. Pearson correlation analysis reveals correlation of reconstitution levels with two nucleosides in humanized mice. A.** Negative correlation between reconstitution levels and cytidine ( $r = -0.64$ ;  $p = 0.002$ ). **B.** Negative correlation between reconstitution levels and deoxycytidine ( $r = -0.61$ ;  $p = 0.003$ ).

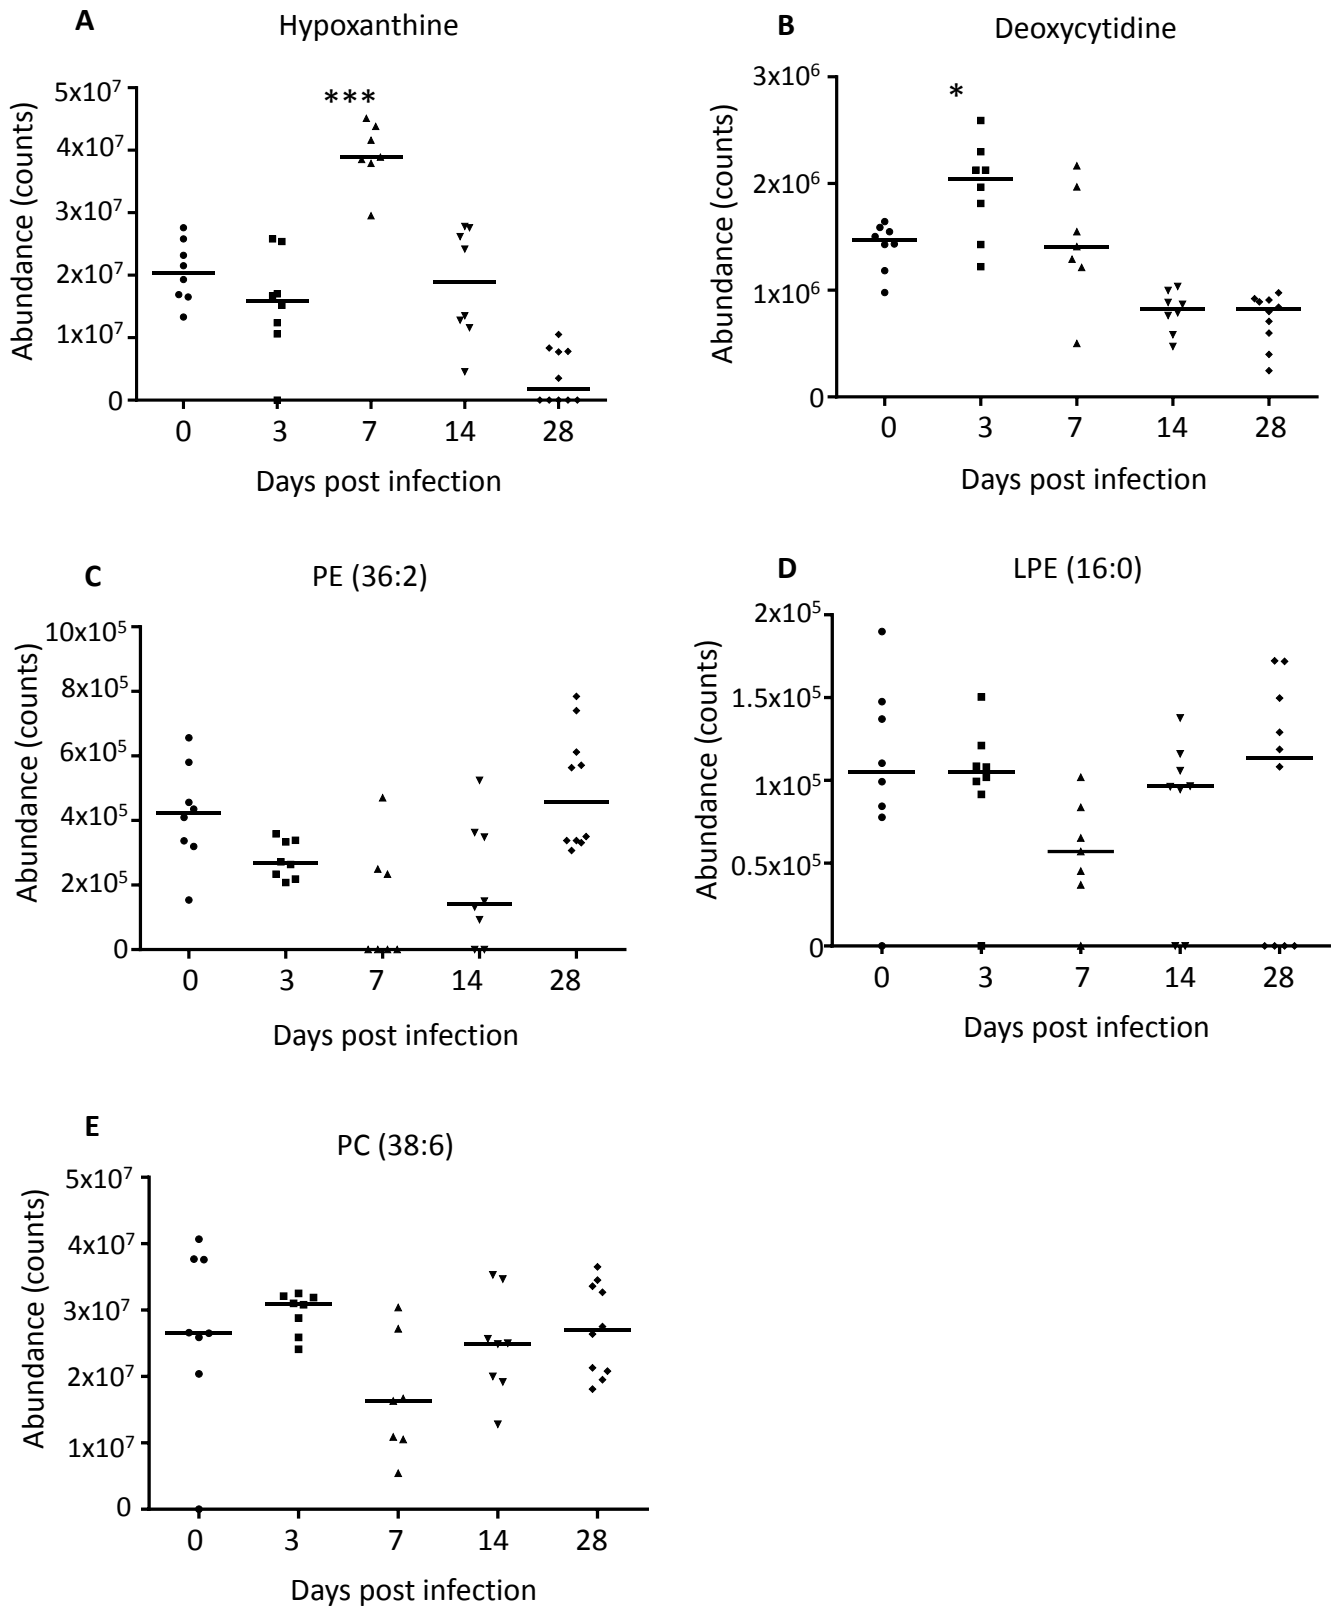

**Figure S3. Scatter plots of differential metabolites in NSG mice with dengue infection. A.** elevated change trend of hypoxanthine. **B.** elevated change trend of deoxycytidine. **C.** decreased change trend of PE (36:2). **D.** decreased change trend of LPE (16:0). **E.** decreased change trend of PC (38:6). \*  $p < 0.05$ , \*\*  $p < 0.01$ , \*\*\*  $p < 0.001$  by test Kruskal-Wallis test. The statistical comparison was with control levels. LPE, lysophosphatidylethanolamine; PE, phosphatidylethanolamine; PC, phosphatidylcholine.

|                                                       | Total | Expected | Hits | Raw p    | -log(p)  | Holm adjust | FDR      | Impact |
|-------------------------------------------------------|-------|----------|------|----------|----------|-------------|----------|--------|
| Glycerophospholipid metabolism                        | 39    | 0.23     | 3    | 1.27E-03 | 6.67E+00 | 1.01E-01    | 1.01E-01 | 0.23   |
| Pyrimidine metabolism                                 | 60    | 0.35     | 3    | 4.41E-03 | 5.42E+00 | 3.48E-01    | 1.76E-01 | 0.03   |
| Biotin metabolism                                     | 11    | 0.06     | 1    | 6.23E-02 | 2.78E+00 | 1.00E+00    | 1.00E+00 | 0.00   |
| Aminoacyl-tRNA biosynthesis                           | 75    | 0.44     | 2    | 6.85E-02 | 2.68E+00 | 1.00E+00    | 1.00E+00 | 0.06   |
| Glycosylphosphatidylinositol(GPI)-anchor biosynthesis | 14    | 0.08     | 1    | 7.86E-02 | 2.54E+00 | 1.00E+00    | 1.00E+00 | 0.04   |
| Linoleic acid metabolism                              | 15    | 0.09     | 1    | 8.40E-02 | 2.48E+00 | 1.00E+00    | 1.00E+00 | 0.00   |
| Taurine and hypotaurine metabolism                    | 20    | 0.12     | 1    | 1.11E-01 | 2.20E+00 | 1.00E+00    | 1.00E+00 | 0.00   |
| Sphingolipid metabolism                               | 25    | 0.15     | 1    | 1.36E-01 | 1.99E+00 | 1.00E+00    | 1.00E+00 | 0.01   |
| alpha-Linolenic acid metabolism                       | 29    | 0.17     | 1    | 1.56E-01 | 1.85E+00 | 1.00E+00    | 1.00E+00 | 0.00   |
| Lysine biosynthesis                                   | 32    | 0.19     | 1    | 1.71E-01 | 1.76E+00 | 1.00E+00    | 1.00E+00 | 0.10   |
| Phenylalanine metabolism                              | 45    | 0.26     | 1    | 2.33E-01 | 1.46E+00 | 1.00E+00    | 1.00E+00 | 0.00   |
| Primary bile acid biosynthesis                        | 47    | 0.27     | 1    | 2.42E-01 | 1.42E+00 | 1.00E+00    | 1.00E+00 | 0.01   |
| Lysine degradation                                    | 47    | 0.27     | 1    | 2.42E-01 | 1.42E+00 | 1.00E+00    | 1.00E+00 | 0.15   |
| Arachidonic acid metabolism                           | 62    | 0.36     | 1    | 3.07E-01 | 1.18E+00 | 1.00E+00    | 1.00E+00 | 0.00   |
| Arginine and proline metabolism                       | 77    | 0.45     | 1    | 3.66E-01 | 1.00E+00 | 1.00E+00    | 1.00E+00 | 0.10   |
| Tryptophan metabolism                                 | 79    | 0.46     | 1    | 3.74E-01 | 9.83E-01 | 1.00E+00    | 1.00E+00 | 0.01   |
| Purine metabolism                                     | 92    | 0.54     | 1    | 4.21E-01 | 8.64E-01 | 1.00E+00    | 1.00E+00 | 0.01   |

**Figure S4. Pathway analysis of humanized mice with dengue infection using Metaboanalyst.**
